# Supplementary material
Source: Springer Nature journal article supplement (https://www.springermedizin.de/resource/supplementary/12936_2010_1381_MOESM10_ESM.pdf/9549666)

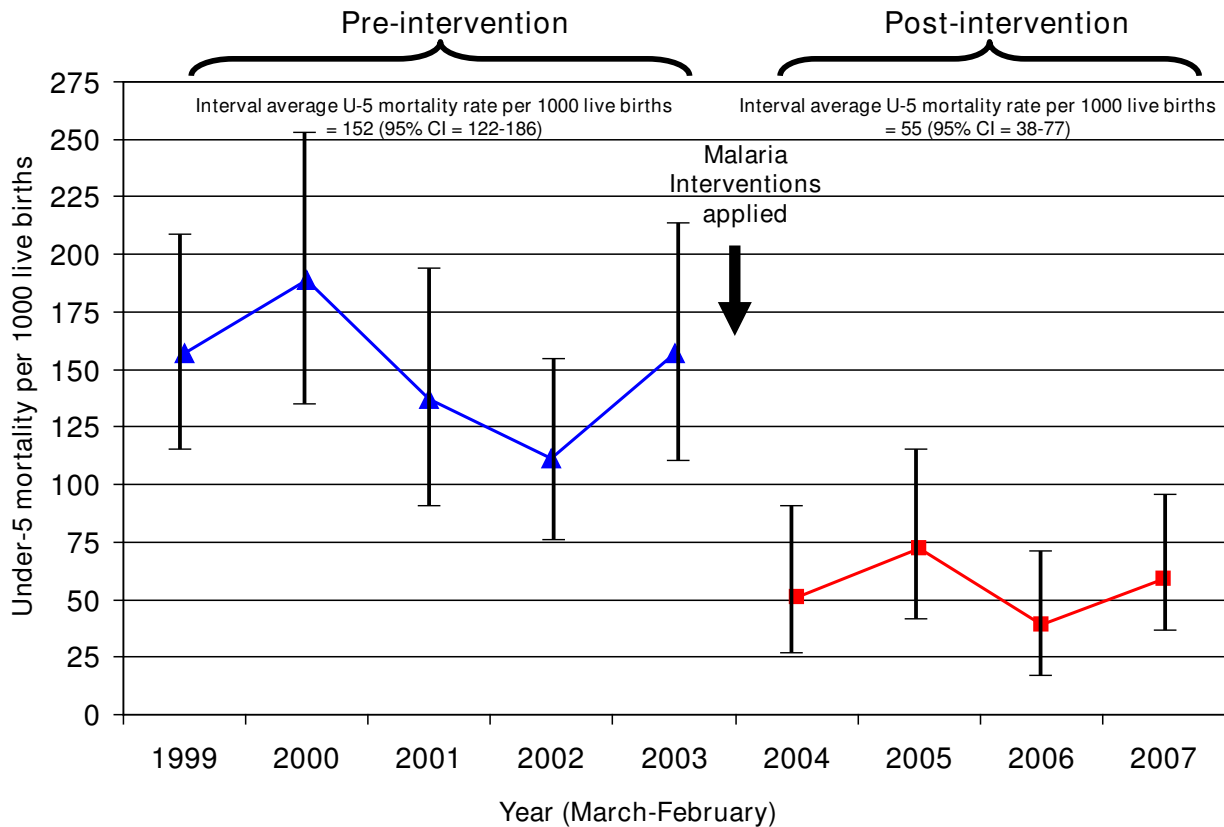

Supplement: MOESM10 [file 9549666]
